# Supplementary material for: Study on Immunoregulatory Effects of Fucoidan from Sargassum graminifolium In Vivo and Immunoactivation Activity of Its Fecal Fermentation Products Using Co-Culture Model
Source: MDPI journal article supplement (doi:10.3390/molecules28237794), 2023-11-27
Supplement: s1 [file s1]

# Study on Immunoregulatory Effects of Fucoidan from *Sargassum graminifolium* in vivo and Immunoactivation Activity of Its Fecal Fermentation Products Using Co-Culture Model

Cuifang Wang <sup>1,2,\*</sup>, Lan Huang <sup>3</sup>, Yaolong Huang <sup>1</sup>, Xin, Tian <sup>1</sup> and Jieqing Liu <sup>3,\*</sup>

<sup>1</sup> College of Oceanology and Food Science, Quanzhou Normal University, Quanzhou 362000, China; huangyaolong@stumail.qztc.edu.cn (Y.H.); 201005017@stumail.qztc.edu.cn (X.T.)

<sup>2</sup> Fujian Province Key Laboratory for the Development of Bioactive Material from Marine Algae, Quanzhou Normal University, Quanzhou 362000, China

<sup>3</sup> School of Medicine, Huaqiao University, Quanzhou 362021, China; hl287216411@163.com

\* Correspondence: wangcuifang@qztc.edu.cn (C.W.); liujieqing@hqu.edu.cn (J.L.)

## Monosaccharide composition results of SGF-1 and SGF-2

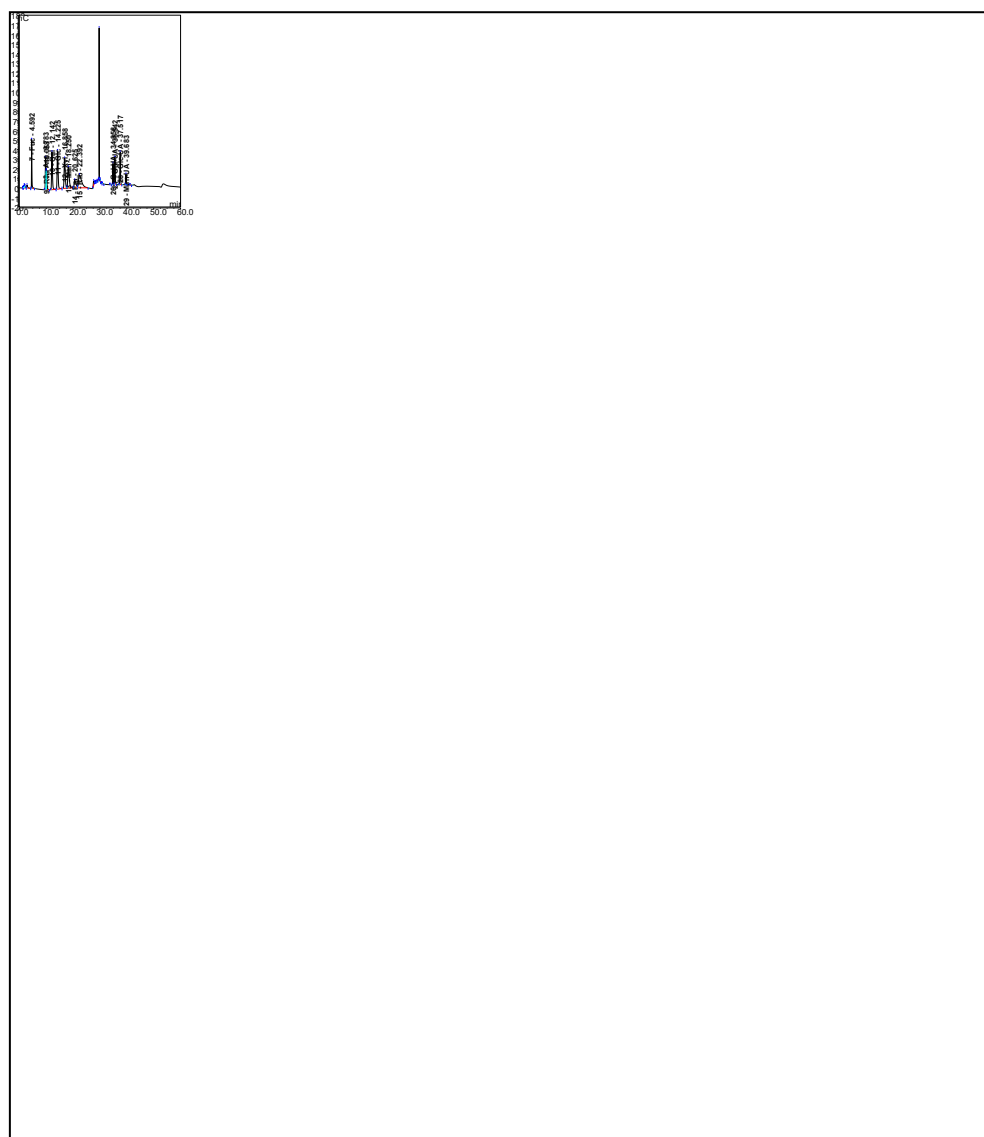

**Figure S1.** Ion chromatogram of standard sample.

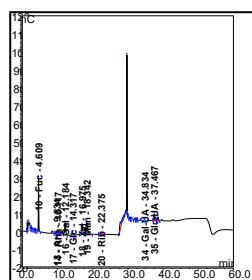

**Figure S2.** Ion chromatogram of SGF-1.

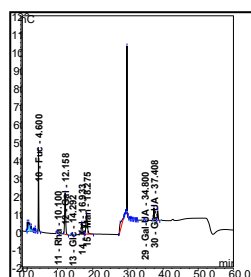

**Figure S3.** Ion chromatogram of SGF-2.

### Molecular weight test results of SGF-1 and SGF-2

**Table S1.** Molecular weight determination of grade SGPF-1and SGPF-2.

|       | Mn (kDa) | Mp (kDa) | Mw (kDa) | Mz (kDa) |
|-------|----------|----------|----------|----------|
| SGF-1 | 23.724   | 250.395  | 112.96   | 454.32   |
| SGF-2 | 138.514  | 255.486  | 258.066  | 606.787  |

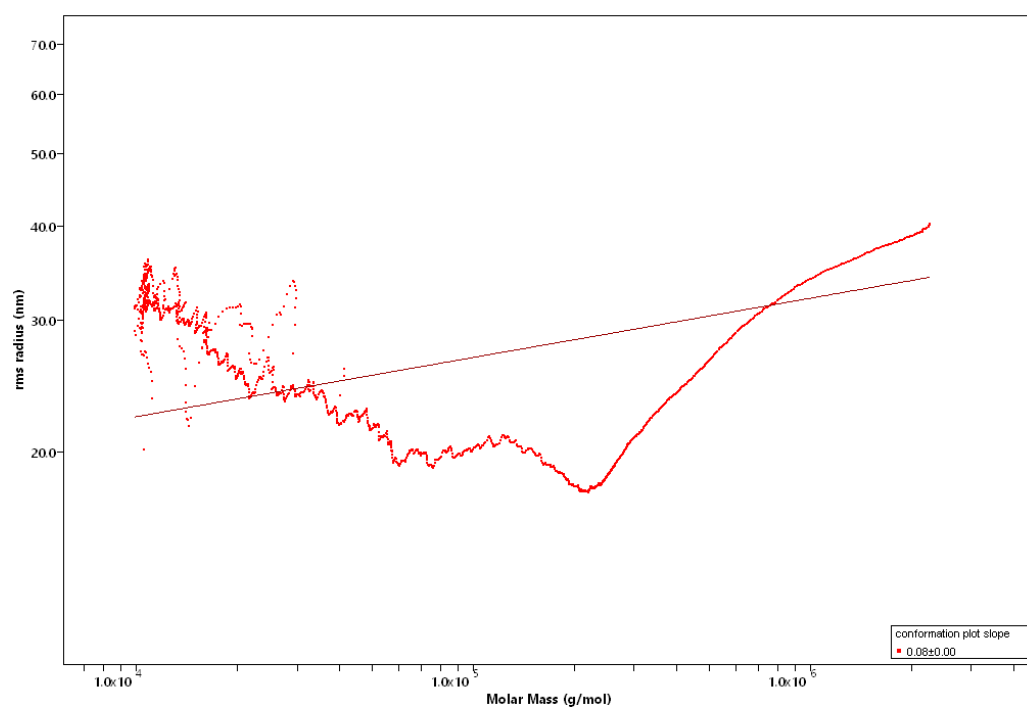

Figure S4. RMS conformation plot of SGF-1.

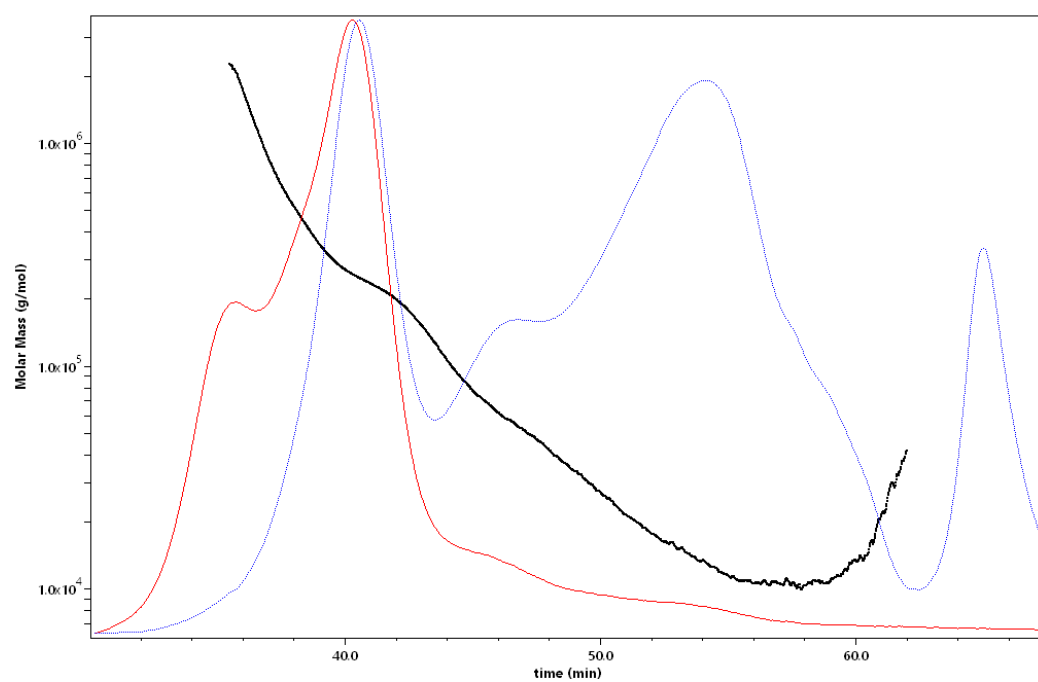

Figure S5. Absolute molecular weight Analysis plot of SGF-1.

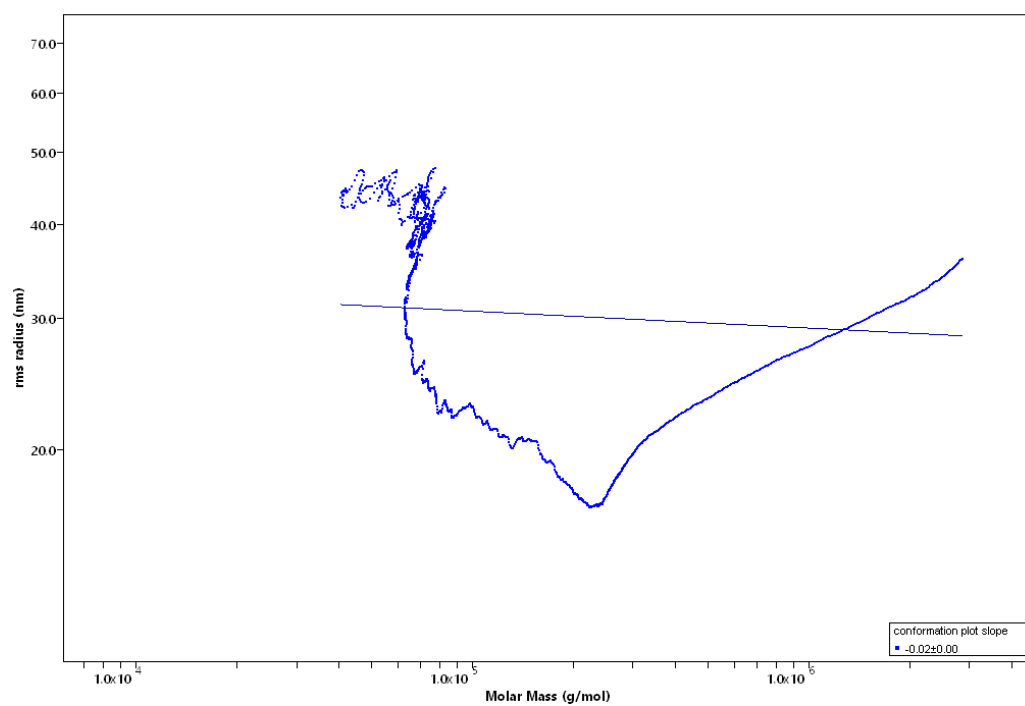

Figure S6. RMS conformation plot of SGF-2.

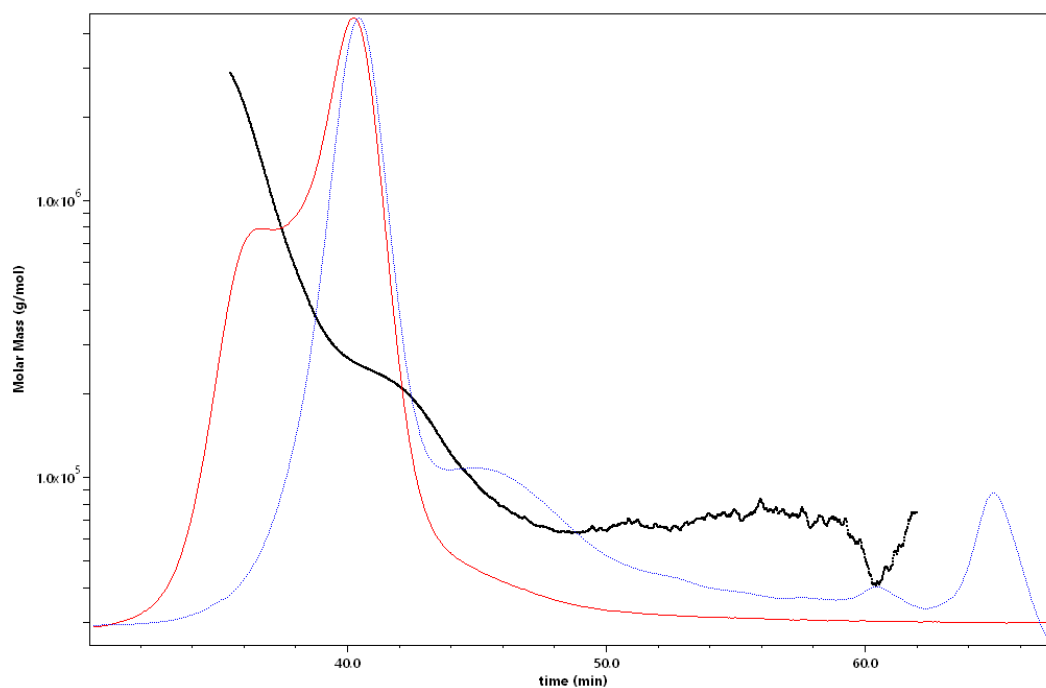

Figure S7. Absolute molecular weight Analysis plot of SGF-2.
